# Supplementary material for: Selective removal of alkynes from diene mixtures using ether-functionalized Cu(i)-containing ionic liquids as extractants
Source: Royal Society of Chemistry journal article supplement (doi:10.1039/c6cp06844h), 2016-12-05
Supplement: c6cp06844h1.pdf [file c6cp06844h1.pdf]

*Supplementary Information*

**Selective removal of alkynes from diene mixtures using ether-functionalized Cu(I)-containing ionic liquids as extractants†**

**Young Jin Kim,<sup>§</sup> Hyun Ji Lee,<sup>§</sup> Shuyao Zhang, Je Seung Lee, Minserk Cheong,<sup>\*</sup> Hoon Sik Kim<sup>\*</sup>**

Department of Chemistry, Kyung Hee University, 26 Kyunghedae-ro, Dongdaemun-gu, Seoul 02447, Republic of Korea

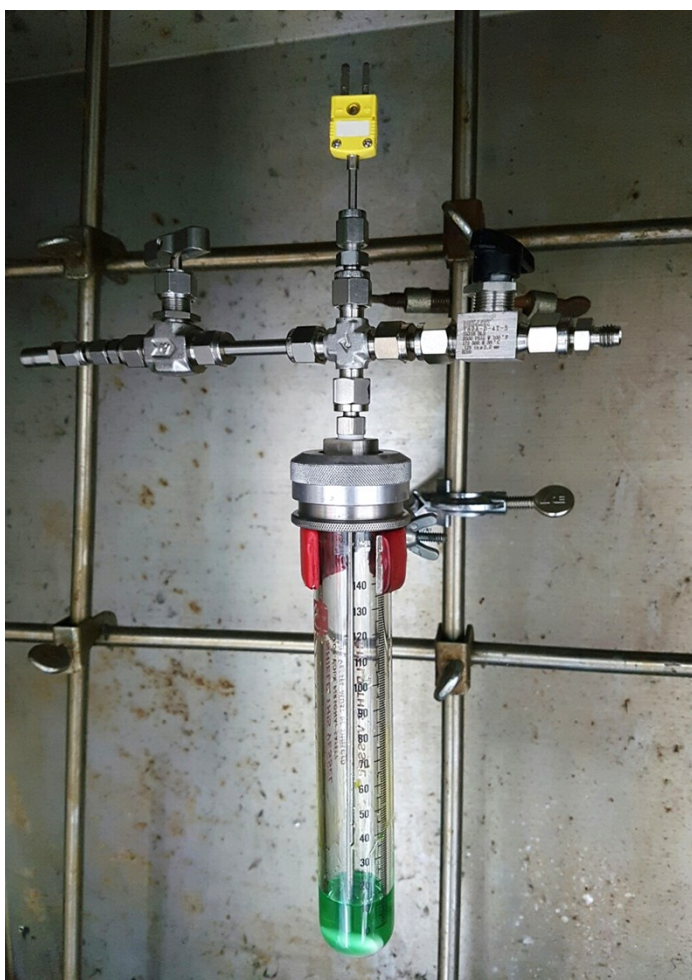

**Fig. S1** A photograph of the equipment used for the alkyne extraction experiments.

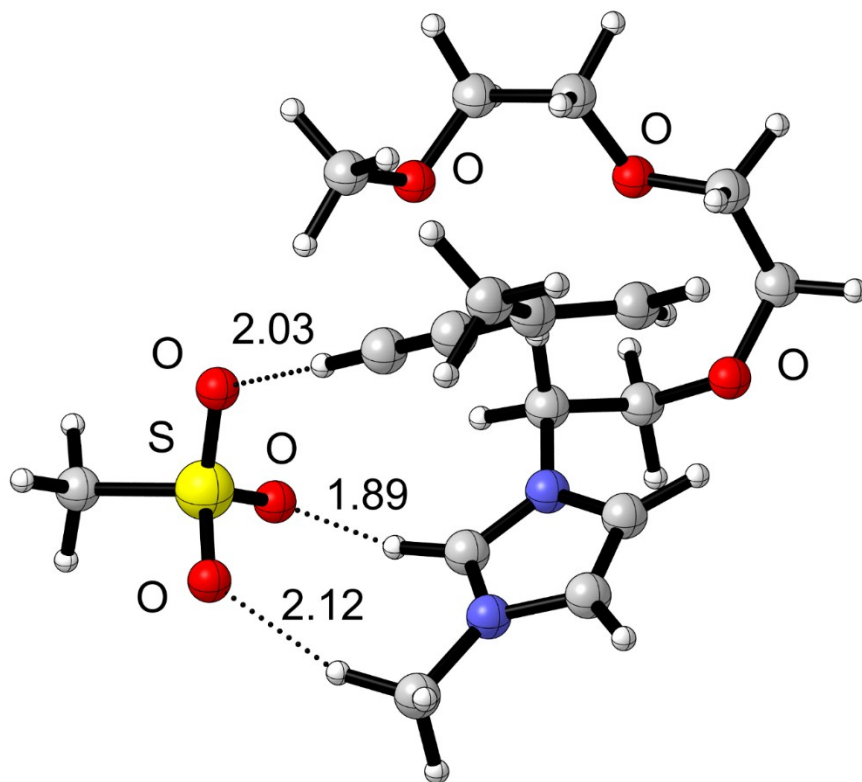

**Fig. S2** Optimized microstructures showing the interaction of  $E_3A$  with IPA ( $\Delta H = -0.5 \text{ kcal mol}^{-1}$ ),

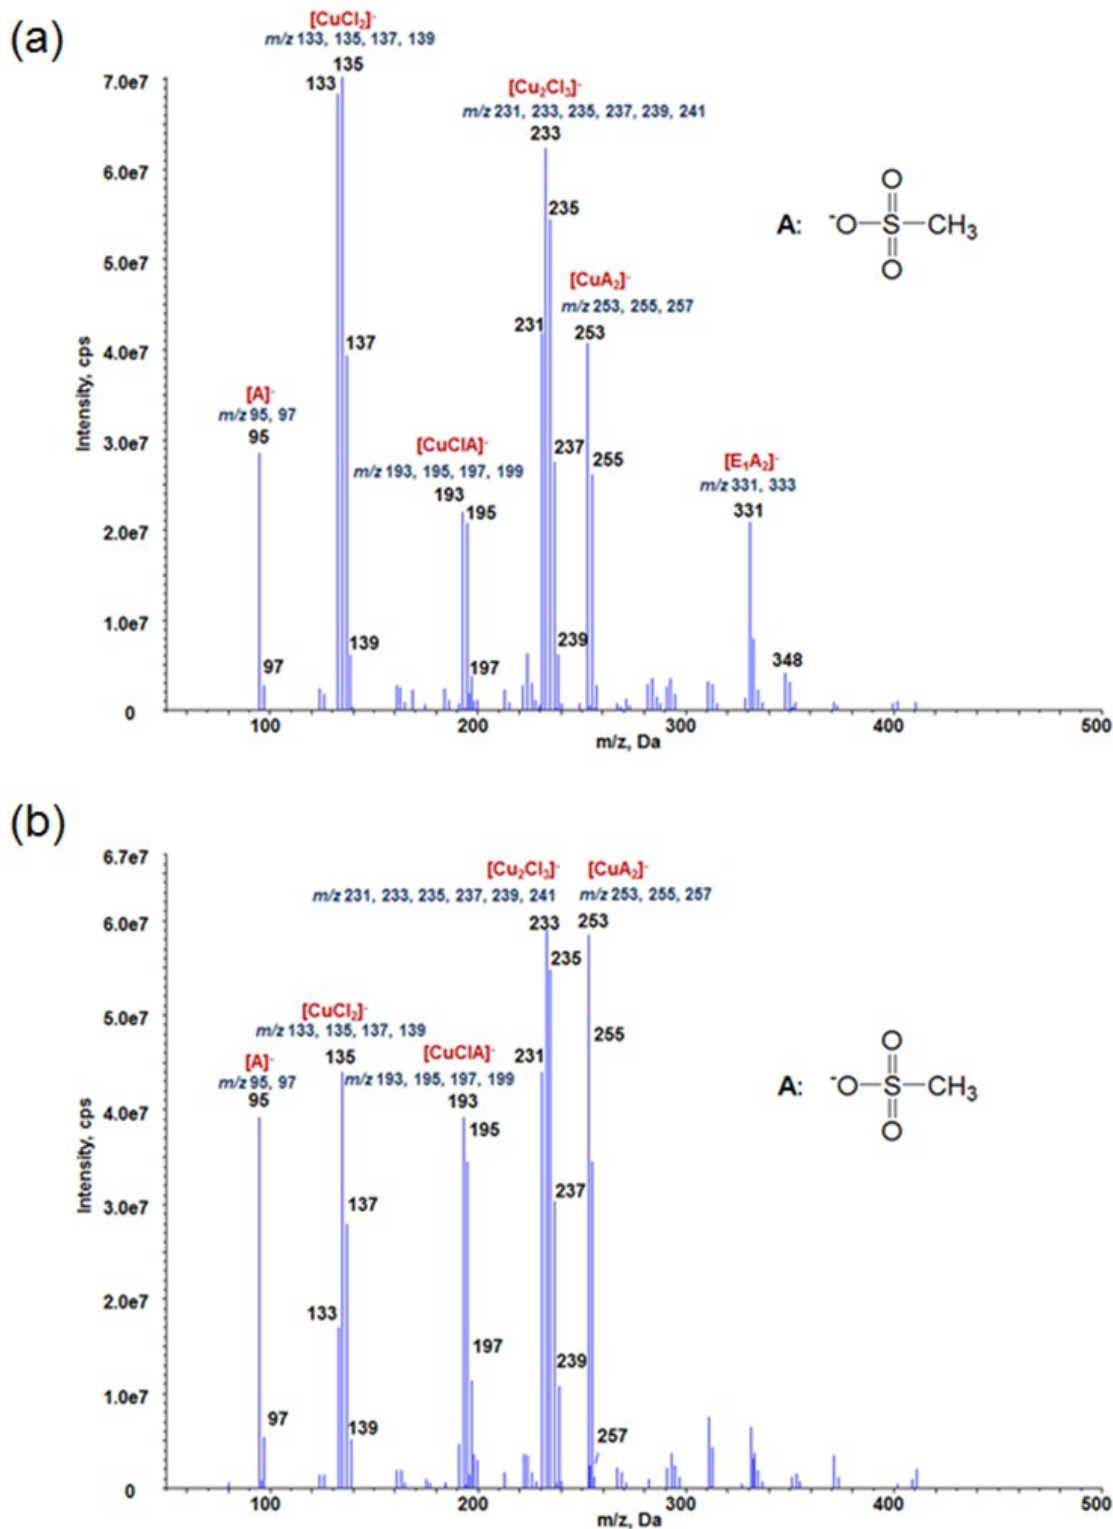

Fig. S3 FAB-mass spectra of (a) Cu- $E_1A$  (molar ratio of  $E_1A/CuCl = 1$ ) and (b) Cu- $E_1A$  (molar ratio of  $E_1A/CuCl = 2$ ).

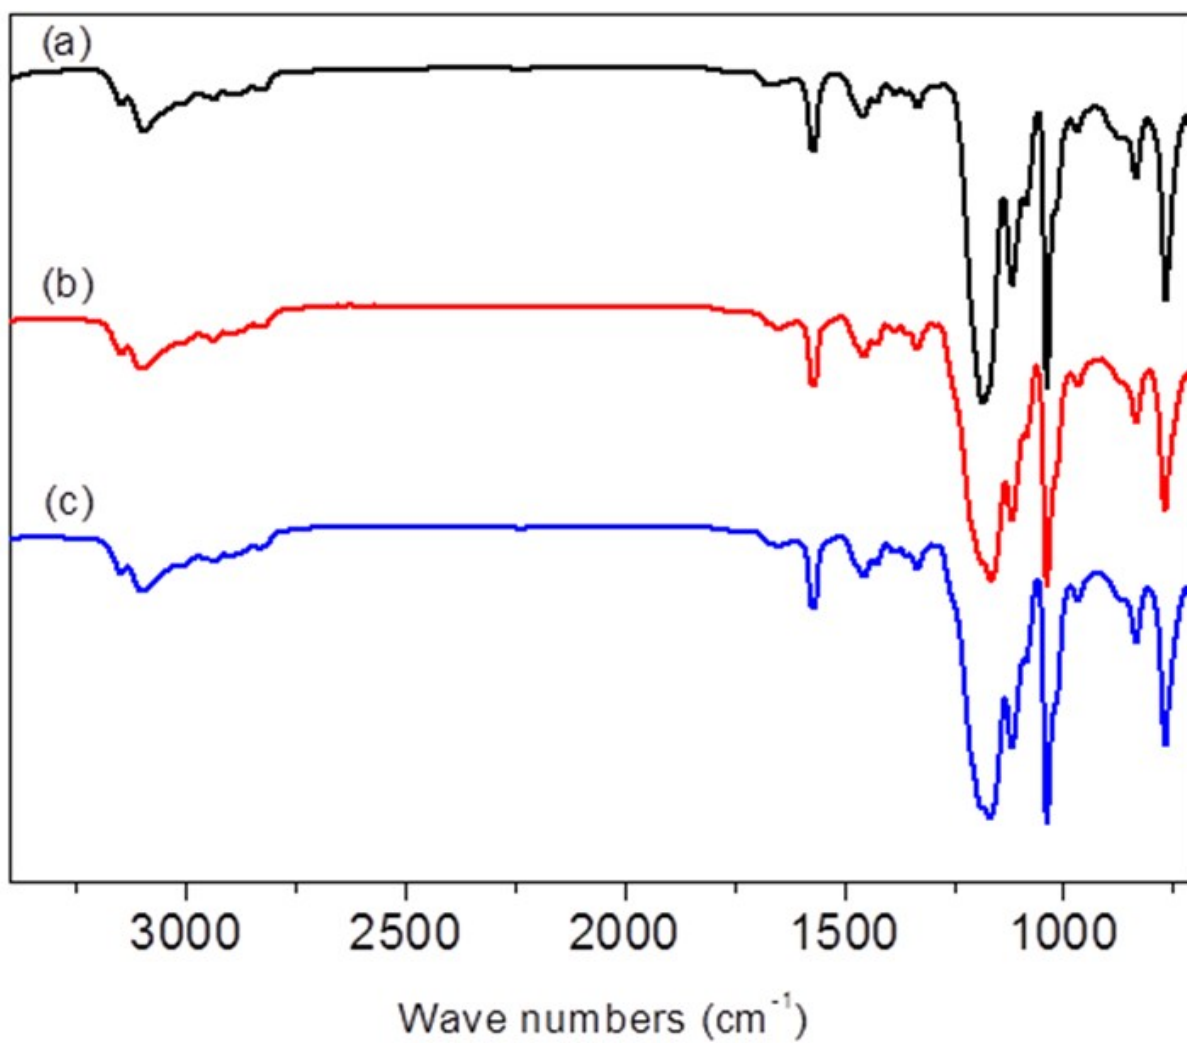

**Fig. S4** FT-IR spectra of (a)  $E_1A$  , (b)  $Cu-E_1A$  (molar ratio of  $E_1A/CuCl = 2$ ), and (c)  $Cu-E_1A$  (molar ratio of  $E_1A/CuCl = 3$ ).
